# Supplementary material for: Determination by ICP-MS of Essential and Toxic Trace Elements in Gums and Carrageenans Used as Food Additives Commercially Available in the Portuguese Market
Source: MDPI journal article supplement (doi:10.3390/foods12071408), 2023-03-26
Supplement: s1 [file s1]

# Determination by ICP-MS of Essential and Toxic Trace Elements in Gums and Carrageenans Used as Food Additives Commercially Available in the Portuguese Market.

Rui Azevedo, Ana Rafaela Oliveira, Agostinho Almeida and Lgia Rebelo Gomes

Table S1. Analytical quality control - Results of certified reference materials analysis (μg/g).

| BCR-679 Cabbage Powder |       |      |      |      |      |       |       |      |      |       |       |       |       |       |        |       |
|------------------------|-------|------|------|------|------|-------|-------|------|------|-------|-------|-------|-------|-------|--------|-------|
|                        | Li    | Al   | Cr   | Mn   | Fe   | Co    | Cu    | Zn   | As   | Se    | Rb    | Sr    | Mo    | Cd    | Hg     | Pb    |
| Mean                   | 0.068 | < LQ | 0.60 | 13.3 | 66   | 0.090 | 2.651 | 74.1 | < LD | 0.125 | 2.276 | 11.96 | 16.50 | 1.572 | < LD   | 0.378 |
| Standard Deviation     | 0.003 | -    | 0.10 | 0.5  | 2    | 0.013 | 0.013 | 1.0  | -    | 0.019 | 0.032 | 0.20  | 0.76  | 0.015 | -      | 0.015 |
| Analytical Value       | -     | -    | 0.60 | 13.3 | 55   | -     | 2.89  | 79.7 | -    | -     | -     | 11.8  | 14.8  | 1.66  | 0.006* | -     |
| Uncertainty            | -     | -    | 0.10 | 0.5  | 2.5  | -     | 0.12  | 2.7  | -    | -     | -     | 0.2   | 0.5   | 0.07  | 0.001  | -     |
| Recovery               | -     | -    | 93%  | 104% | 120% | -     | 92%   | 93%  | -    | -     | -     | 101%  | 112%  | 95%   | 301%   | -     |

\*Inferior to the limit of detection (LD).

| BCR-482 Lichen Powder |       |      |      |      |     |       |      |       |       |       |      |       |       |       |       |      |
|-----------------------|-------|------|------|------|-----|-------|------|-------|-------|-------|------|-------|-------|-------|-------|------|
|                       | Li    | Al   | Cr   | Mn   | Fe  | Co    | Cu   | Zn    | As    | Se    | Rb   | Sr    | Mo    | Cd    | Hg    | Pb   |
| Mean                  | 0.665 | 1001 | 3.67 | 27.2 | 668 | 0.297 | 5.77 | 75.4  | 0.763 | 0.521 | 7.65 | 8.699 | 0.372 | 0.478 | 0.455 | 38.1 |
| Standard Deviation    | 0.015 | 38   | 0.11 | 1.0  | 25  | 0.017 | 0.17 | 2.3   | 0.053 | 0.029 | 0.23 | 0.082 | 0.017 | 0.055 | 0.018 | 2.3  |
| Analytical Value      | -     | 1103 | 4.12 | 33.0 | 804 | 0.32  | 7.03 | 100.6 | 0.85  | 0.60  | -    | -     | 0.85  | 0.56  | 0.48  | 40.9 |
| Uncertainty           | -     | 24   | 0.15 | 0.5  | 160 | 0.03  | 0.19 | 2.2   | 0.07  | 0.20  | -    | -     | 0.01  | 0.02  | 0.02  | 1.4  |
| Recovery              | -     | 91%  | 89%  | 82%  | 83% | 93%   | 82%  | 75%   | 90%   | 87%   | -    | -     | 44%   | 85%   | 95%   | 93%  |

Table S2. Limits of detection (LD) and limits of quantification (LQ; μg/g).

|    | Li    | Al   | Cr    | Mn    | Fe   | Co    | Cu    | Zn    | As    | Se    | Rb    | Sr    | Mo    | Cd    | Hg    | Pb    |
|----|-------|------|-------|-------|------|-------|-------|-------|-------|-------|-------|-------|-------|-------|-------|-------|
| LD | 0.018 | 5.1  | 0.025 | 0.029 | 0.23 | 0.002 | 0.033 | 0.034 | 0.047 | 0.022 | 0.008 | 0.081 | 0.006 | 0.003 | 0.009 | 0.007 |
| LQ | 0.053 | 15.5 | 0.074 | 0.086 | 0.69 | 0.005 | 0.099 | 0.10  | 0.14  | 0.067 | 0.023 | 0.24  | 0.018 | 0.009 | 0.028 | 0.020 |

The limits of detection (LD) and quantification (LQ) of every element were obtained by the following formula, respectively:  $SD_{blanks} \times 3.3$  and  $SD_{blanks} \times 10$
